# Supplementary material for: Magnetically recyclable Co/ZnO@NiFe2O4 nanoparticles as highly active and reusable catalysts for hydrazine monohydrate hydrogen generation
Source: Royal Society of Chemistry journal article supplement (doi:10.1039/d0cy01829e), 2020-12-09
Supplement: d0cy01829e1.pdf [file d0cy01829e1.pdf]

1 **Magnetically recyclable Co/ZnO@NiFe<sub>2</sub>O<sub>4</sub> Nano particle catalyst as a highly**  
2 **active and reusable catalyst for hydrazine monohydrate hydrogen generation**

3

4 Samikannu Prabu and Kung-Yuh Chiang\*

5 Graduate Institute of Environmental Engineering, National Central University, Tao-Yuan city,

6 32001, Taiwan

7 Corresponding author: Prof. Kung-Yuh Chiang Email: [kychiang@ncu.edu.tw](mailto:kychiang@ncu.edu.tw)

8

9 **Contents**

|    |                         |    |
|----|-------------------------|----|
| 10 | <b>Fig. S1</b> .....    | 2  |
| 11 | <b>Fig. S2</b> .....    | 3  |
| 12 | <b>Fig. S3</b> .....    | 4  |
| 13 | <b>Fig. S4</b> .....    | 5  |
| 14 | <b>Fig. S5</b> .....    | 6  |
| 15 | <b>Fig. S6</b> .....    | 7  |
| 16 | <b>Fig. S7</b> .....    | 8  |
| 17 | <b>Fig. S8</b> .....    | 11 |
| 18 | <b>Fig. S9</b> .....    | 12 |
| 19 | <b>Fig. S10</b> .....   | 13 |
| 20 | <b>Fig. S11</b> .....   | 15 |
| 21 | <b>Fig. S12</b> .....   | 16 |
| 22 | <b>Fig. S13</b> .....   | 17 |
| 23 | <b>Table S1</b> .....   | 18 |
| 24 | <b>Table S2</b> .....   | 18 |
| 25 | <b>References</b> ..... | 20 |

26

27

28

29

30

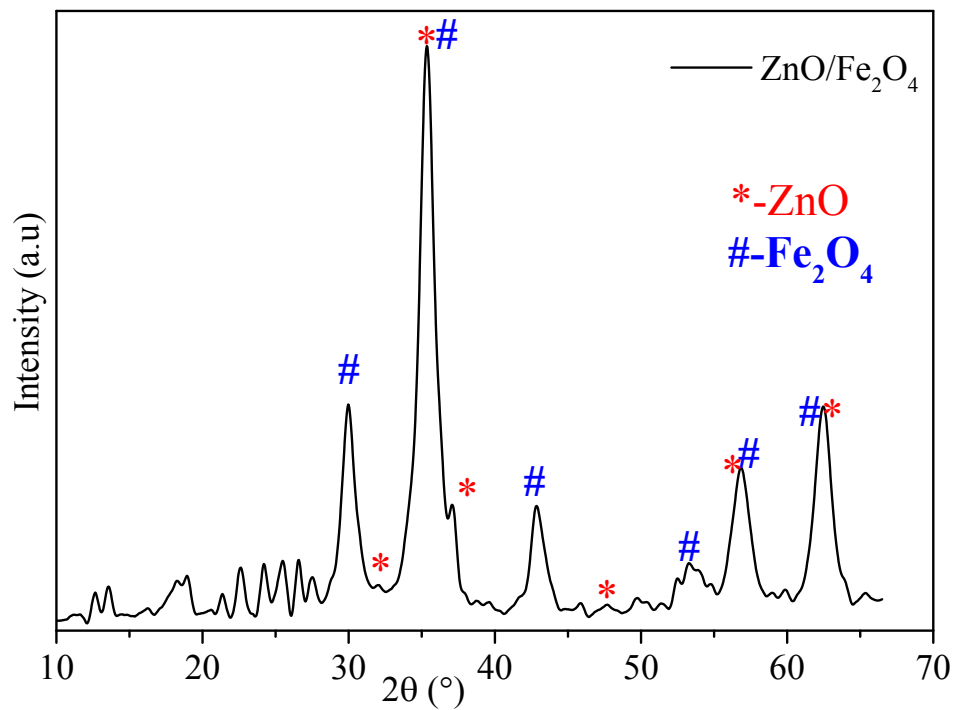

1

2 **Fig. S1** XRD patterns of ZnO@Fe<sub>2</sub>O<sub>4</sub> nanoparticle catalysts.

3

4

5

6

7

8

9

10

11

12

13

14

15

16

17

1  
2  
3  
4  
5  
6

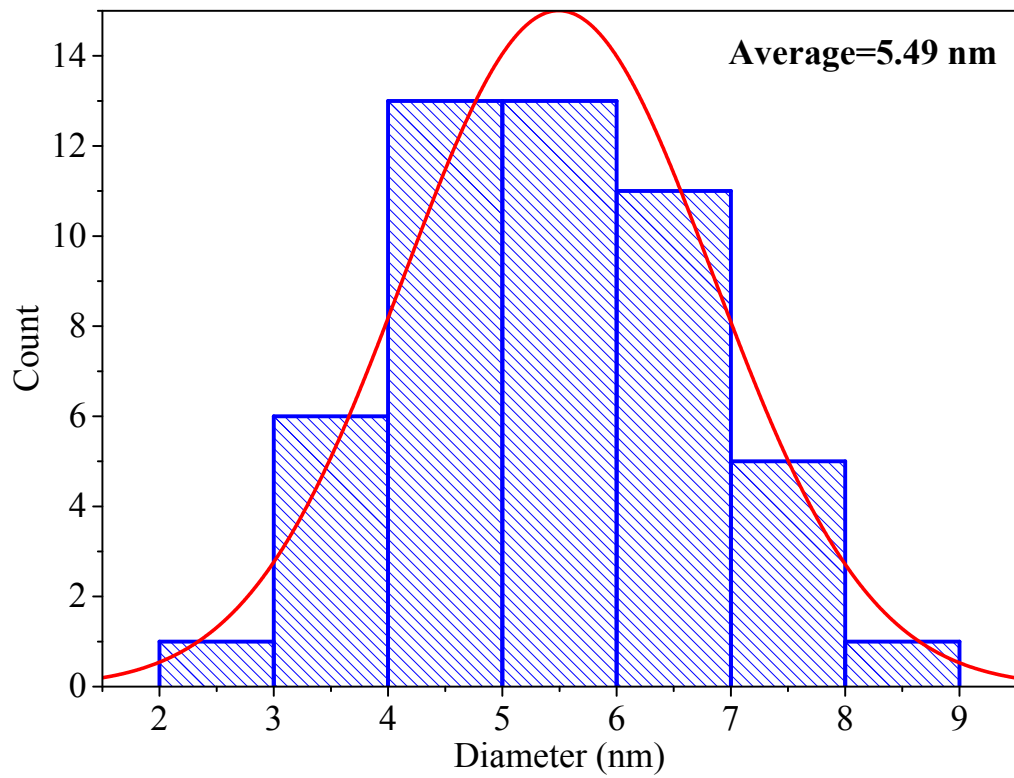

7  
8  
9  
10  
11  
12  
13  
14  
15  
16

**Fig. S2** Co/ZnO@NiFe<sub>2</sub>O<sub>4</sub> NPs particle size histograms.

1  
2  
3  
4

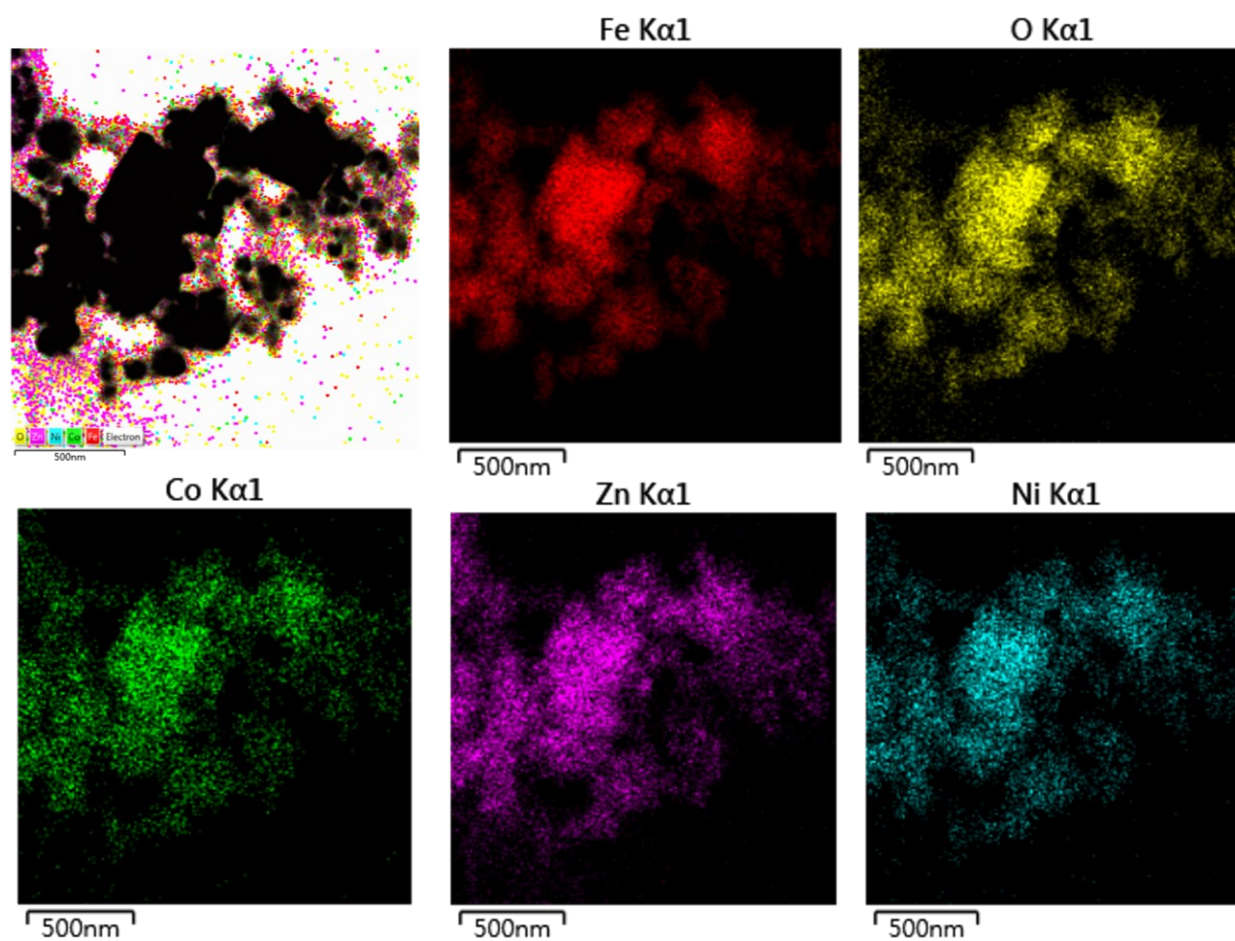

5  
6  
7  
8  
9  
10  
11  
12

**Fig. S3** Co/ZnO@NiFe<sub>2</sub>O<sub>4</sub> NPs TEM EDX mapping analysis. The scale bar is 500 nm.

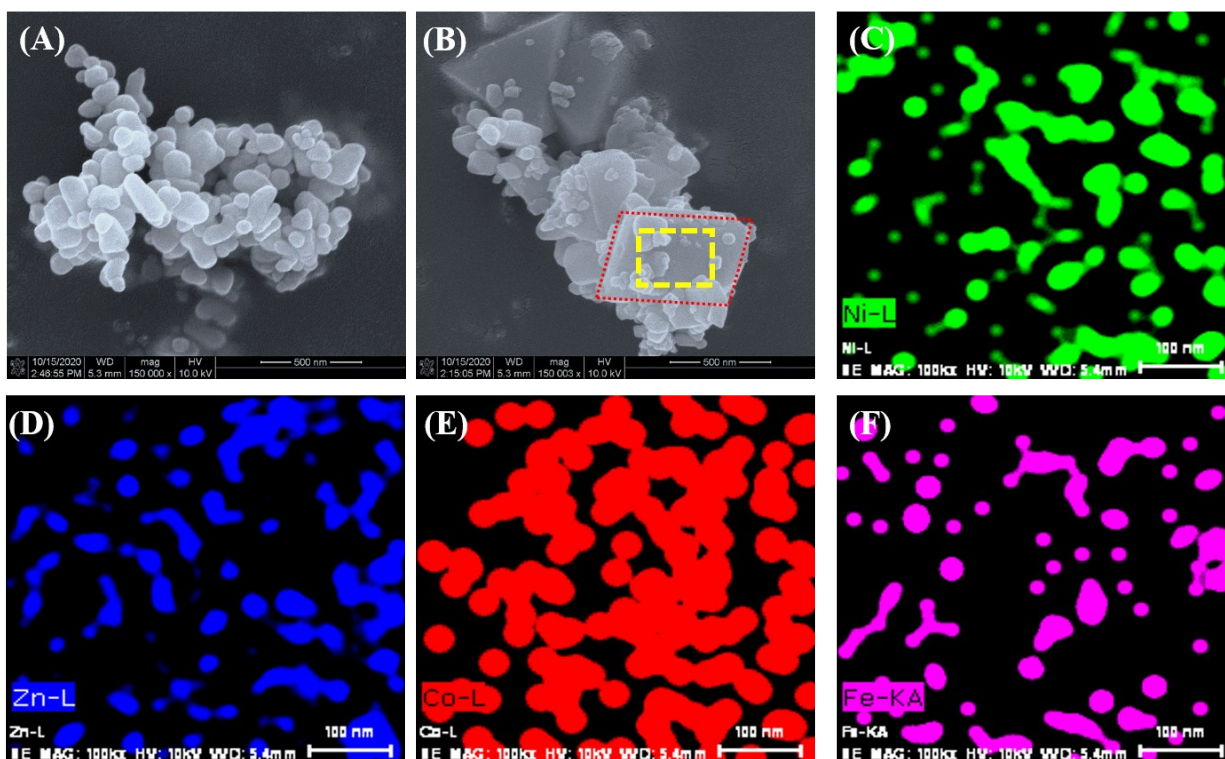

1

2

3 **Fig. S4.** FE-SEM images of ZnO and Co/ZnO@NiFe<sub>2</sub>O<sub>4</sub> NPs and elemental mapping analysis of  
 4 (C) Ni, (D) Zn, (E) Co and (F) Fe, scale bar: 100 nm.

5 The surface morphology of catalyst is one of the important parameters that affect the hydrogen  
 6 generation efficiency. The NPs catalysts were investigated by FE-SEM image as shown in **Figure**  
 7 **S4** The FE-SEM images shows that the ZnO and Co/ZnO@NiFe<sub>2</sub>O<sub>4</sub> NPs were formed in a very  
 8 uniform manner in the form of cubes and a few of them appeared spherically. In order to better  
 9 discern the composition of the sample, elemental mapping analysis has been done. **Figure S4**  
 10 (C)~(F) illustrates the Energy-dispersive X-ray spectroscopy (EDX) mapping analysis of Co, Ni,  
 11 C, Fe, and O for the Co/ZnO@NiFe<sub>2</sub>O<sub>4</sub> NPs sample. The results confirm the presence of all these  
 12 elements in the sample which distributed quasi uniformly in the studied section. This result  
 13 demonstrates the successful preparation of the powder sample.

14

1  
2

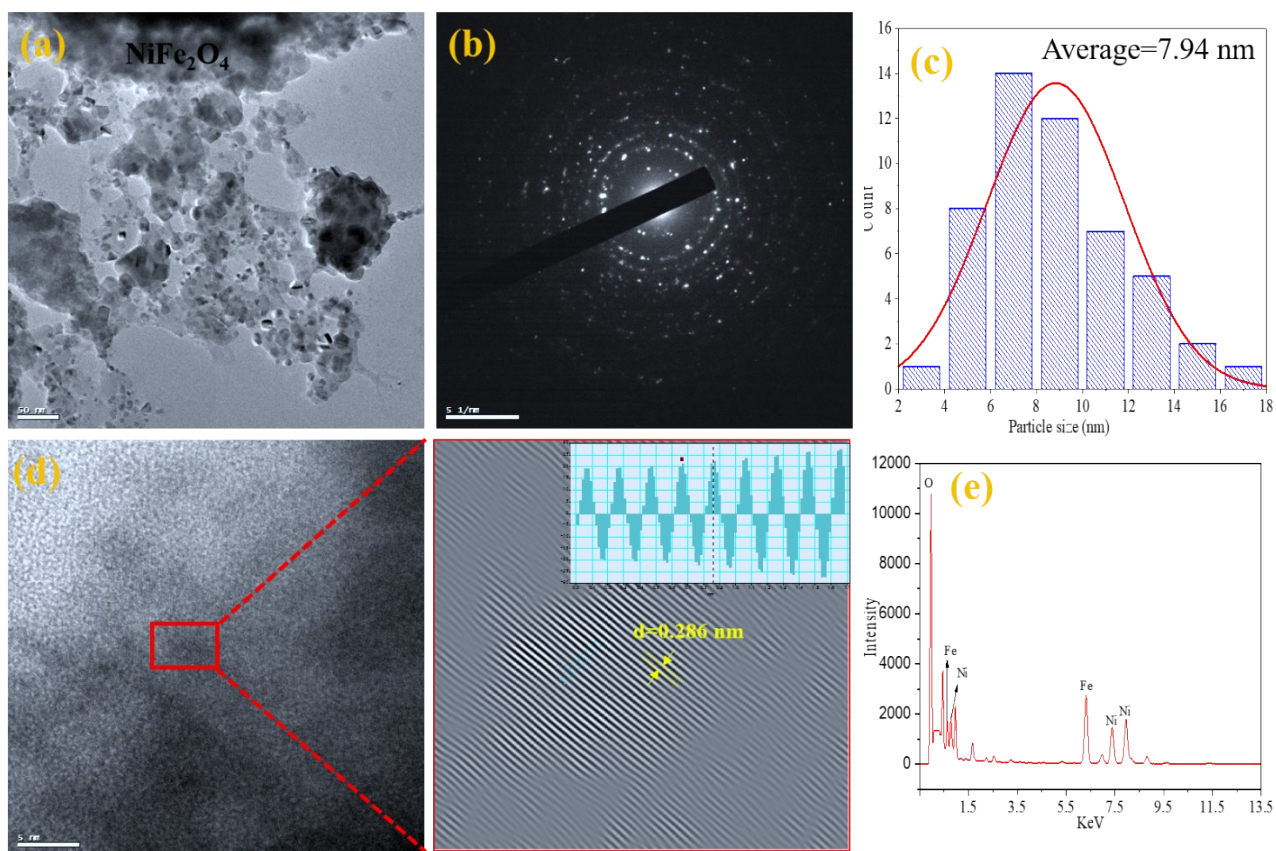

3

4 **Fig. S5** TEM images of nickel ferrite with the scale bar of (a) 50 nm, and (b) show the  
5 corresponding size distribution and SAED patterns, (c) The particle size histograms of NiFe<sub>2</sub>O<sub>4</sub>  
6 NPs , (d) TEM images of nickel ferrite with the scale bar of 5 nm, (e) TEM-EDX spectrum of  
7 NiFe<sub>2</sub>O<sub>4</sub> NPs.

8

9

10

11



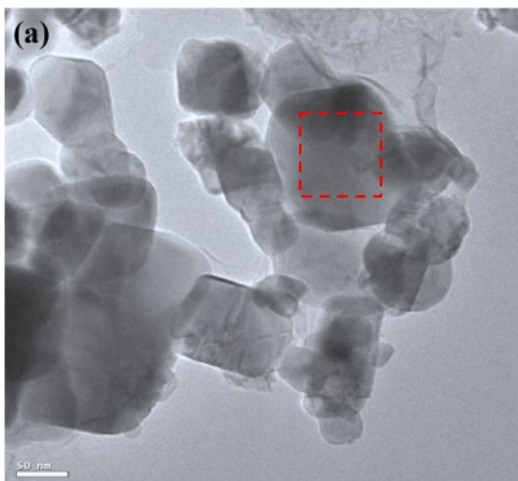

| Element       | Wt%           | Atomic %      |
|---------------|---------------|---------------|
| O             | 27.00         | 56.7          |
| Fe            | 46.50         | 29.08         |
| Ni            | 8.6           | 4.9           |
| Zn            | 17.90         | 9.32          |
| <b>Total:</b> | <b>100.00</b> | <b>100.00</b> |

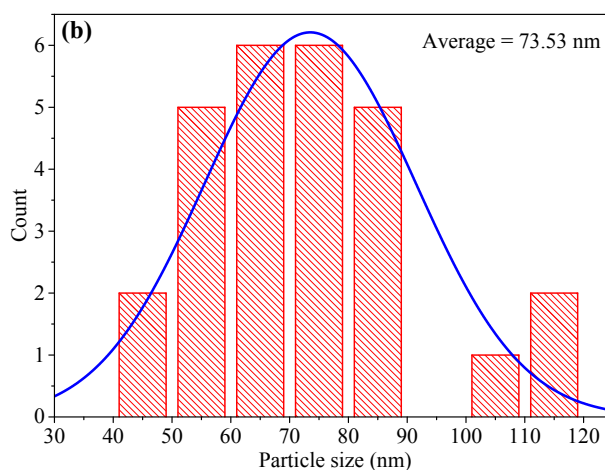

1

2

3 **Fig. S6** TEM images of ZnO@NiFe<sub>2</sub>O<sub>4</sub> NPs (a) and (b) show the corresponding size distribution.

4

5 A transition electron microscopy (TEM) image (Fig. S6a) reveals clearly that NiFe<sub>2</sub>O<sub>4</sub> NPs are  
 6 coated with ZnO forming a core and shell structure, with an average particle size of 73.53 nm (Fig.  
 7 S6b). This structure facilitates electron transfer in composite (between NiFe<sub>2</sub>O<sub>4</sub> and ZnO) and  
 8 gives the benefit to hydrogen generation from **decomposition of hydrazine in aqueous solution**.

9 Further ZnO@NiFe<sub>2</sub>O<sub>4</sub> NPs TEM EDX spectrum with a cobalt load of 2.0 wt%, indicating that  
 10 cobalt is the only element detected in the sample in addition to the ZnO@NiFe<sub>2</sub>O<sub>4</sub> NPs (O, Ni, Fe,  
 11 Zn) framework elements.

12

1

2

3

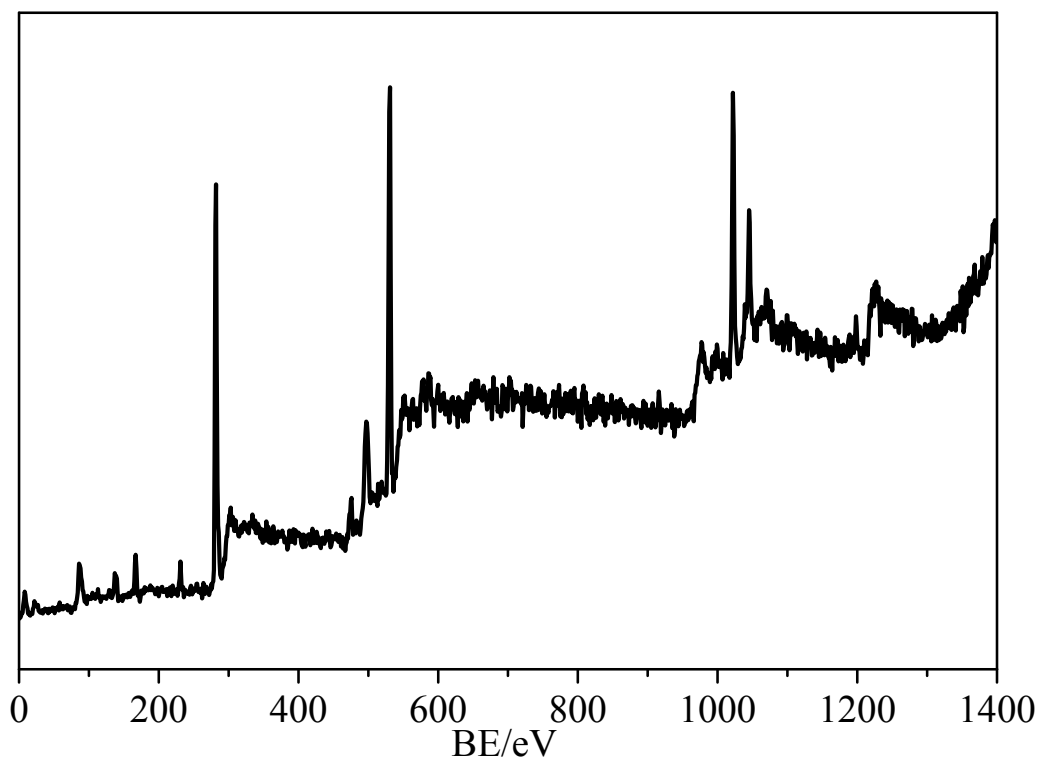

4

5 **Fig. S7** the XPS spectrum of the fresh Co/ZnO@NiFe<sub>2</sub>O<sub>4</sub> NPs.

6

7

8

9

10

11

12

13

14



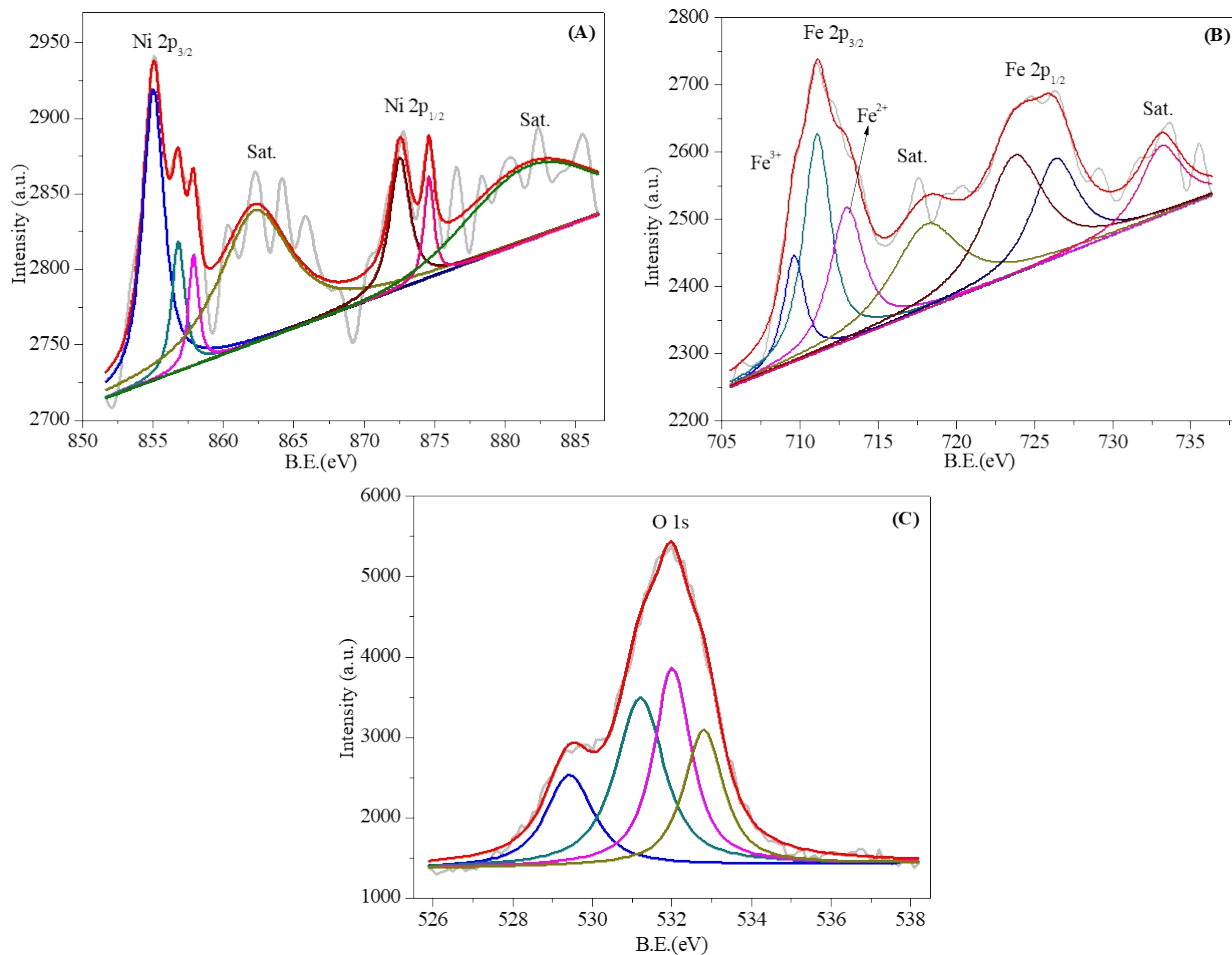

1

2 **Fig. S8** XPS spectra of (a) Ni 2p, (b) Fe 2p, (c) O 1s for NiFe<sub>2</sub>O<sub>4</sub> NPs.

3

4 Fig. S8 describes the Ni 2p (Fig. S7a), Fe 2p (Fig. S8b), and O 1s (Fig. S8c) core-level XPS  
 5 spectra for NiFe<sub>2</sub>O<sub>4</sub> calcined at 750 °C, respectively. The peaks with BE of 855.30 eV refer to the  
 6 Ni<sup>2+</sup> ions in the lattice.<sup>S1</sup> Meanwhile, there is a BE component at 855.10 eV consistent to reduced  
 7 Ni<sup>2+</sup>, which is well-known to occur as a result of the high NiFe<sub>2</sub>O<sub>4</sub> NPs catalyst crystallization at  
 8 this temperature. Ni deficiency sites occur on the surface, or corresponding to the high NiFe<sub>2</sub>O<sub>4</sub>  
 9 NPs catalyst crystallization, in which the Ni atoms migrate Ni<sup>3+</sup> (857.01 eV) to the most favorite  
 10 crystalline sites.

1 The XPS spectrum of Fe 2p core-level calcined at 750 °C is depicted in Fig. S8b. Three  
 2 components were identified: at BE of 710.99 eV (Fe 2p<sub>3/2</sub>) and 724.90 eV (Fe 2p<sub>1/2</sub>) corresponding  
 3 to Fe<sup>3+</sup> ions present in the tetrahedral and the octahedral sites of the spinel structure, respectively.  
 4 The high binding energy (HBE) component with BE of 717.54 eV might be the satellite shake-up  
 5 structure of tetrahedral and octahedral ions. After calcination at 850 °C (Fig. S8b), no significant  
 6 changes were observed in the Fe 2p core-level of NiFe<sub>2</sub>O<sub>4</sub> NPs. Fig. S8c shows the O 1s spectra.  
 7 The peak at 529.55 eV is assigned to the contribution of crystal lattice oxygen. Additionally, the  
 8 peaks at 531.90 are ascribed to the defects, impurities, and captivated oxygen on the spinal  
 9 surface.<sup>S2</sup>

10

11 It has been reported that hydrazine decomposition ( $\text{N}_2\text{H}_4 \rightarrow \text{N}_2(\text{g}) + 2\text{H}_2(\text{g})$ ) may proceed  
 12 through different pathways related to the reaction conditions including reaction temperature. In  
 13 one pathway, N<sub>2</sub> is formed intra-molecularly and not by the recombination of nitrogen species  
 14 (equation I-1 to I-5).

15 **Pathway-I**

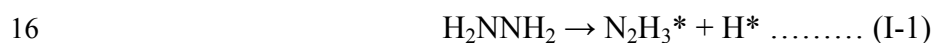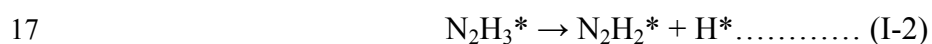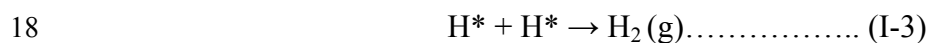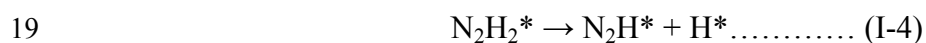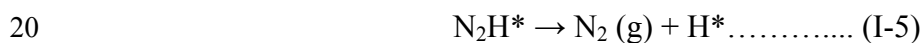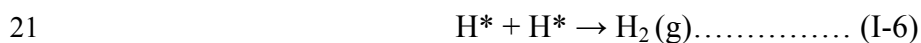

22 In the second pathway the N-N bond breaks to form the NH<sub>2</sub> species on the surface [Equation (II-  
 23 1)], which further decomposes into nitrogen and hydrogen [Equation (II-3) and (II-4)]. It has been

1 reported that activity energy (Ea) for one pathway is always smaller than Ea for the second  
2 pathway.

3 **Pathway-II**

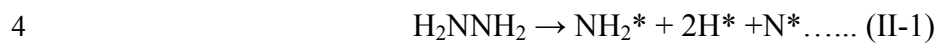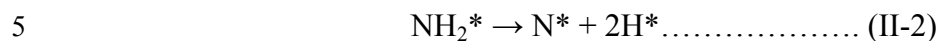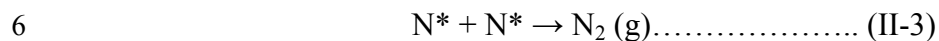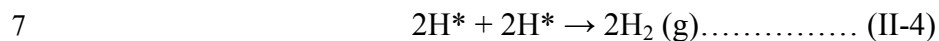

8 At lower temperatures, the Ea value is 44.84 kJ/mol, indicating that the second hydrazine  
9 decomposition pathway is increasing. This is the reason the H<sub>2</sub> evolution plots at higher  
10 temperatures slightly faster than those at lower temperatures.

11

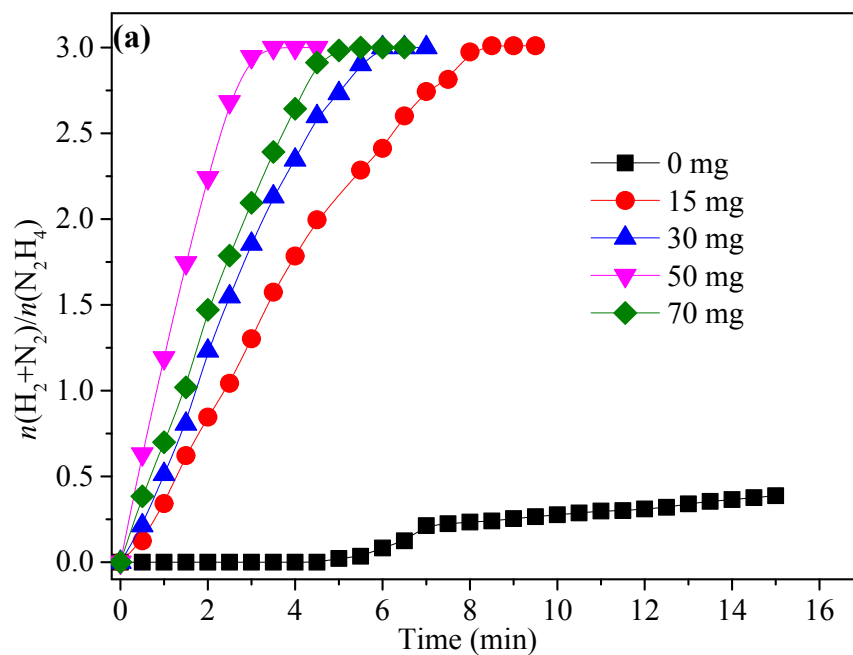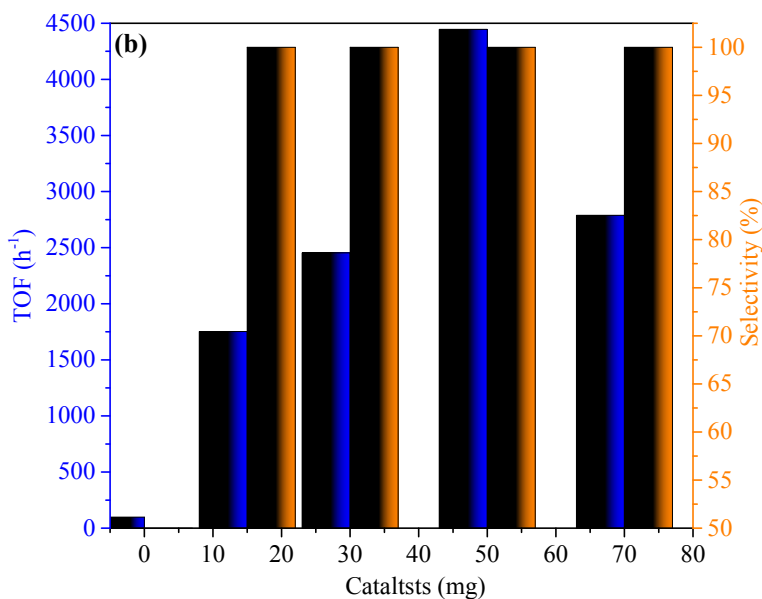

1

2

3 **Fig. S9** (a) Time course plots and (b) the corresponding TOF values and hydrogen selectivity for  
 4 hydrogen generation from aqueous  $N_2H_4$  solution (2 mmole,  $T = 25^\circ C$ ) and different amount of  
 5  $Co/ZnO@NiFe_2O_4$  NPs catalysts with 2.0 M NaOH ( $Co+Ni+Fe/N_2H_4 = 0.02$ ).

6

7

1 Fig. S10 demonstrates the XPS investigation of used Co/ZnO@NiFe<sub>2</sub>O<sub>4</sub> NPs, in which the  
2 statistics of emitted photoelectrons are given as a function of the binding energy up to 1300 eV.  
3 Six photoemission peaks (Co 2*p*, Fe 2*p*, Ni 2*p*, Zn 2*p*, O 1*s* and C 1*s*) perform in the extensive  
4 spectra of the Co/ZnO@NiFe<sub>2</sub>O<sub>4</sub> NPs (Fig. S11). The detailed spectrum of Co 2*p* peaks in Fig.  
5 S11a are equivalent to Ni 2*p* peaks, and the peaks of Co 2*p*<sub>3/2</sub> and Co2*p*<sub>1/2</sub> equally can be  
6 fragmented to two peaks with BE values of 778.15, 783.37 eV, and 792.56, 796.60 eV, respectively  
7 (Table S1), resemble to Co (III) and Co (II). As a trace of Co (II) in the catalyst surface can be  
8 oxidized to Co (III) in the sample load and characterization, Co (III) can be perceived. As seen  
9 from Fig. S11b (Fe2*p* spectra), trace iron content resulted in strong peak intensity. Both samples  
10 exhibit three peaks at 709.63 eV, 715.98 eV and 723.53 eV, which correspond to the binding  
11 energy of Fe<sup>3+</sup> 2*p*<sub>3/2</sub>, shake-up satellite Fe<sup>3+</sup> 2*p*<sub>3/2</sub> and Fe<sup>3+</sup> 2*p*<sub>1/2</sub>, respectively. The detailed spectrum  
12 of Ni 2*p* peaks magnified from the wide spectrum of the Co/ZnO@NiFe<sub>2</sub>O<sub>4</sub> NPs shows two peaks  
13 at 856.93 eV and 874.94 eV due to the spin–orbit splitting of 2*p*<sub>3/2</sub> and 2*p*<sub>1/2</sub>, respectively (Fig.  
14 S11c), and two satellite peaks at 861.88 and 883.34 eV are two shakeup type peaks of nickel at the  
15 high binding energy side of Ni 2*p*<sub>3/2</sub> and Ni 2*p*<sub>1/2</sub>. As shown in Fig. S11d, the XPS spectrum of Zn  
16 2*p* reveals the binding energies of Zn 2*p*<sub>3/2</sub> at about 1,021.71 eV and Zn 2*p*<sub>1/2</sub> positioned at 1,044.95  
17 eV, respectively. The de-convoluted peaks at 528.32 and 530.17 eV correspond to lattice oxygen,  
18 oxygen vacancies in the NiFe<sub>2</sub>O<sub>4</sub> environment and insecurely bound oxygen at the NiFe<sub>2</sub>O<sub>4</sub> and  
19 Zn NP surface, respectively (Fig. S11e). In Fig. S11f, the C 1*s* spectra of the Co/ZnO@NiFe<sub>2</sub>O<sub>4</sub>  
20 NPs was de-convoluted into three peaks, which corresponds to O–C=O (285.04 eV), C–O (283.62  
21 eV), and C=C (281.79 eV). The results reveal that Co, Fe, Ni, Zn, O and C ions in both samples  
22 (before and after **catalytic decomposition of hydrazine in aqueous solution**) have the same  
23 valances at the surface and internal.

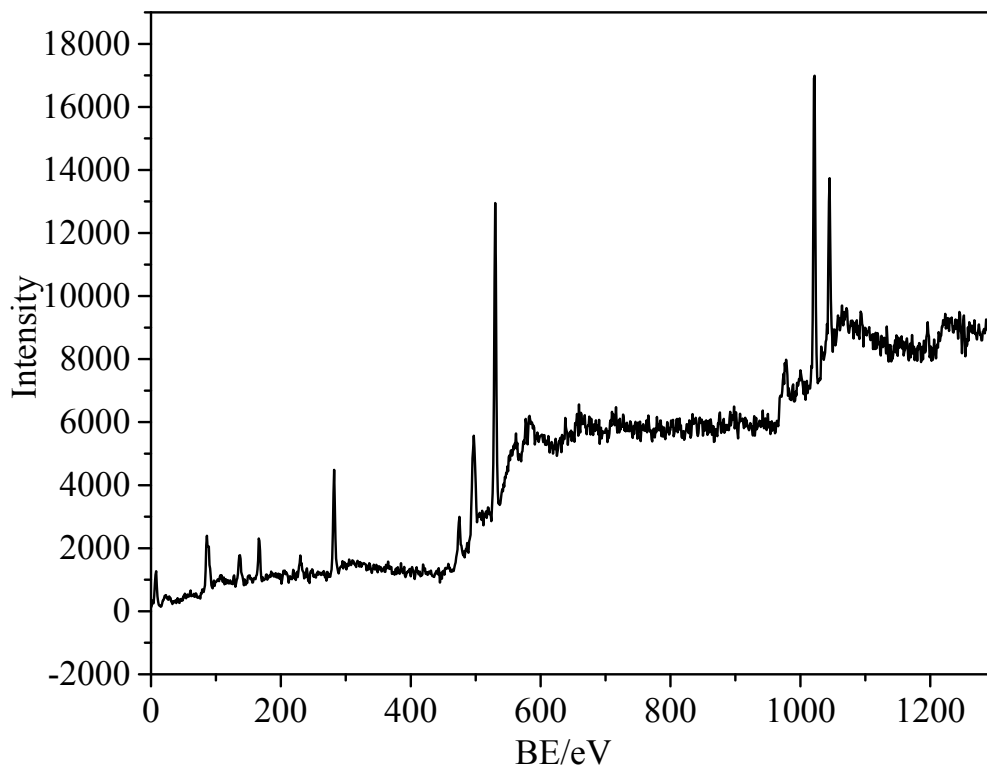

1

2

**Fig. S10** the XPS spectrum of the used Co/ZnO@NiFe<sub>2</sub>O<sub>4</sub> NPs.

3

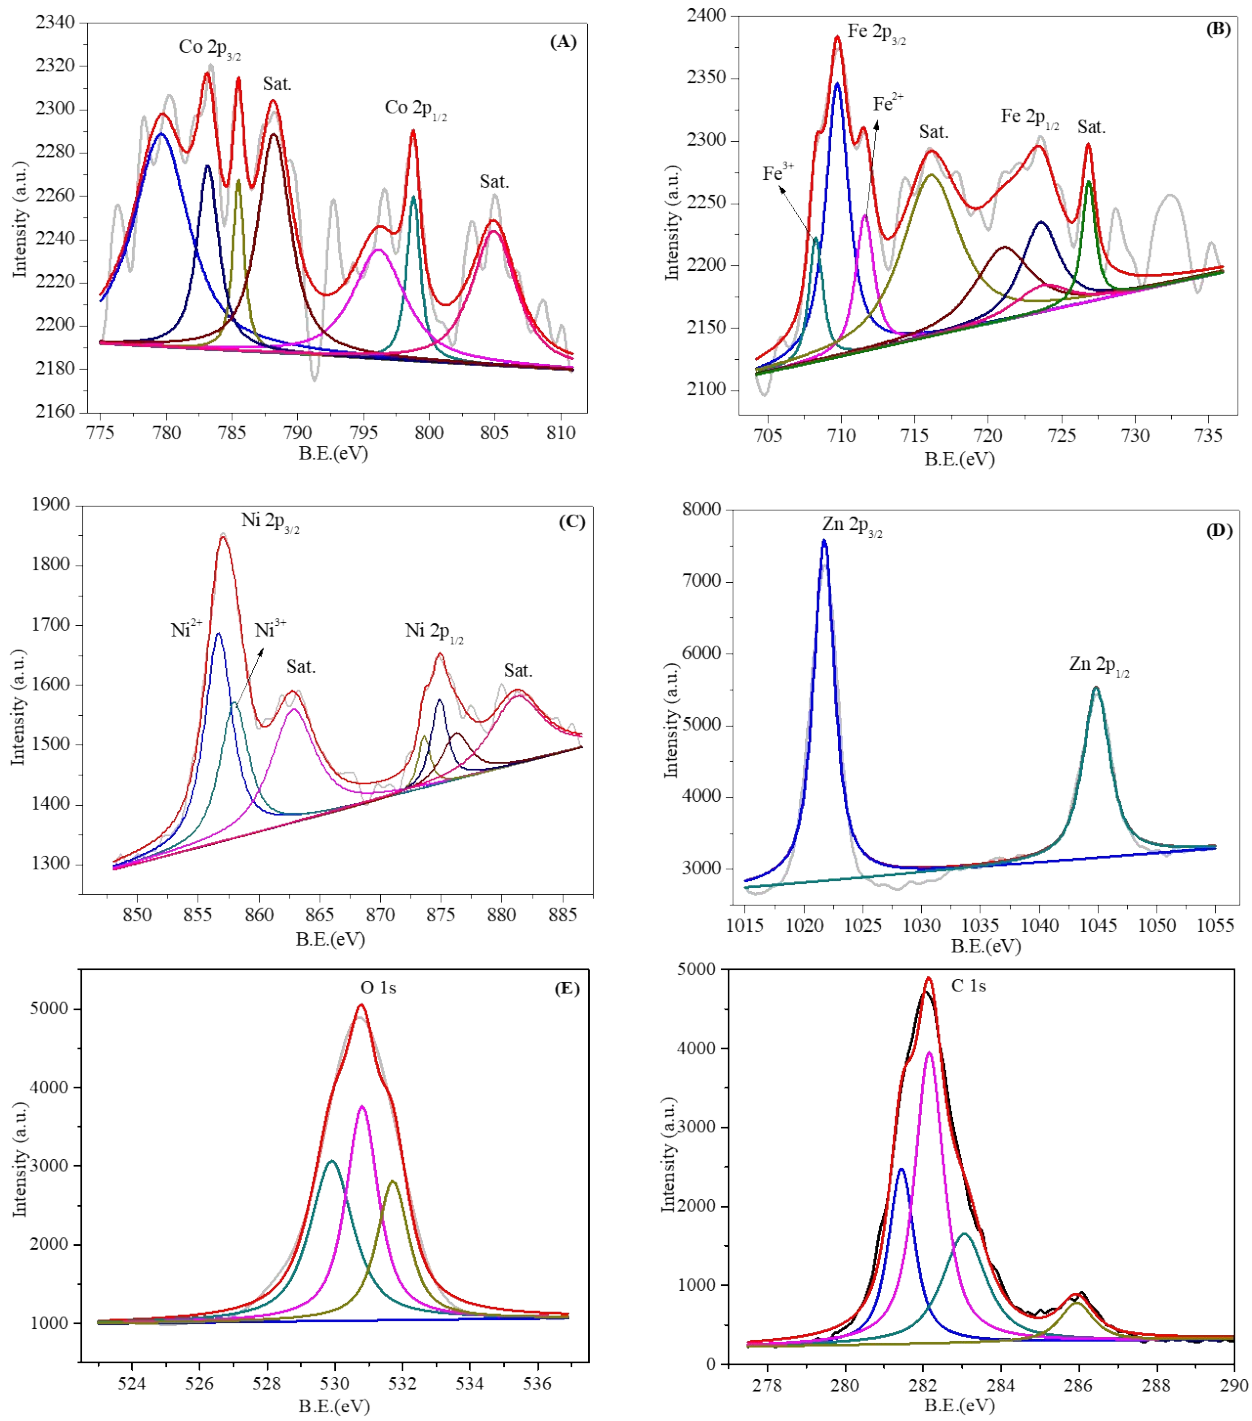

1

2 **Fig. S11** XPS analysis of Co/ZnO@NiFe<sub>2</sub>O<sub>4</sub> NPs and detailed analysis of Co 2p (a),

3 Fe 2p (b), Ni 2p (c), Zn 2p (d), O 1s (e) and C 1s.

4

5



1  
2  
3  
4

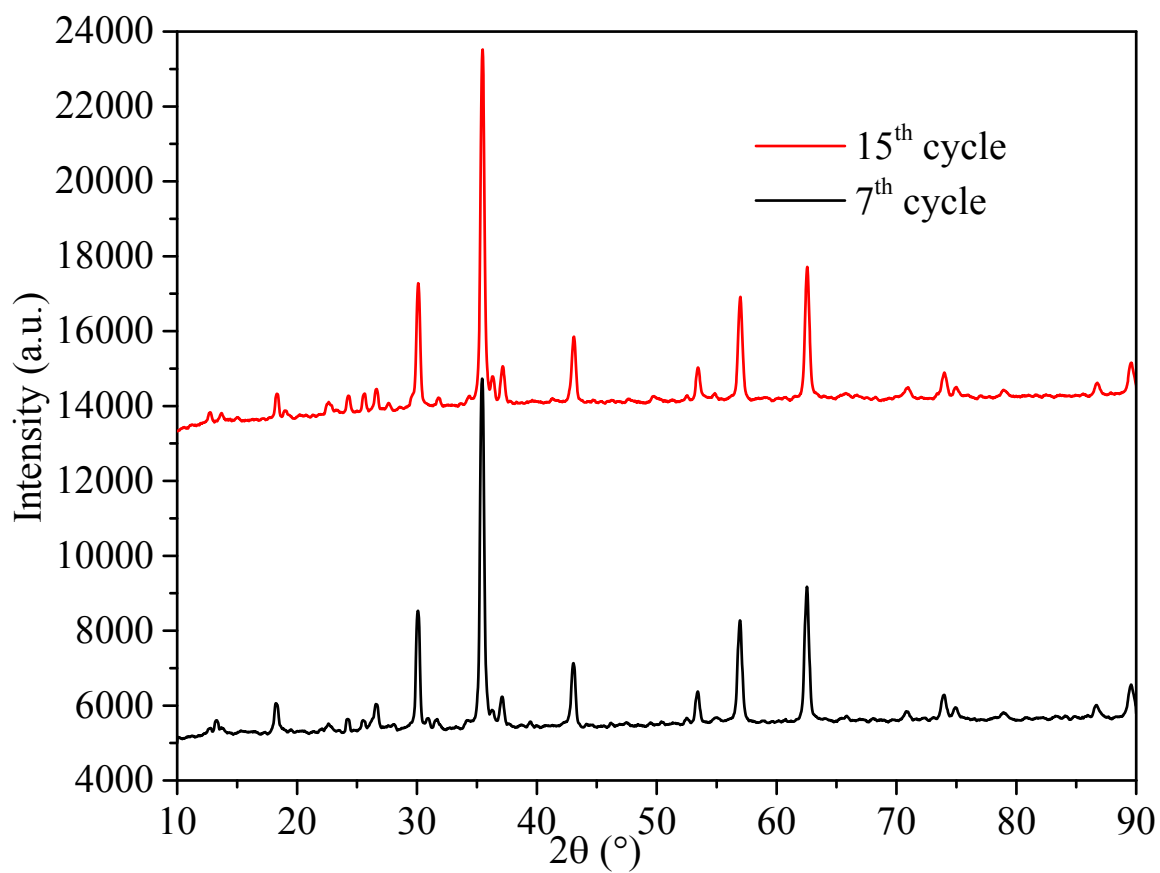

5

6 **Fig. S12** XRD pattern of the post-used Co/ZnO@NiFe<sub>2</sub>O<sub>4</sub> NPs catalyst after fifteen cyclic usages.

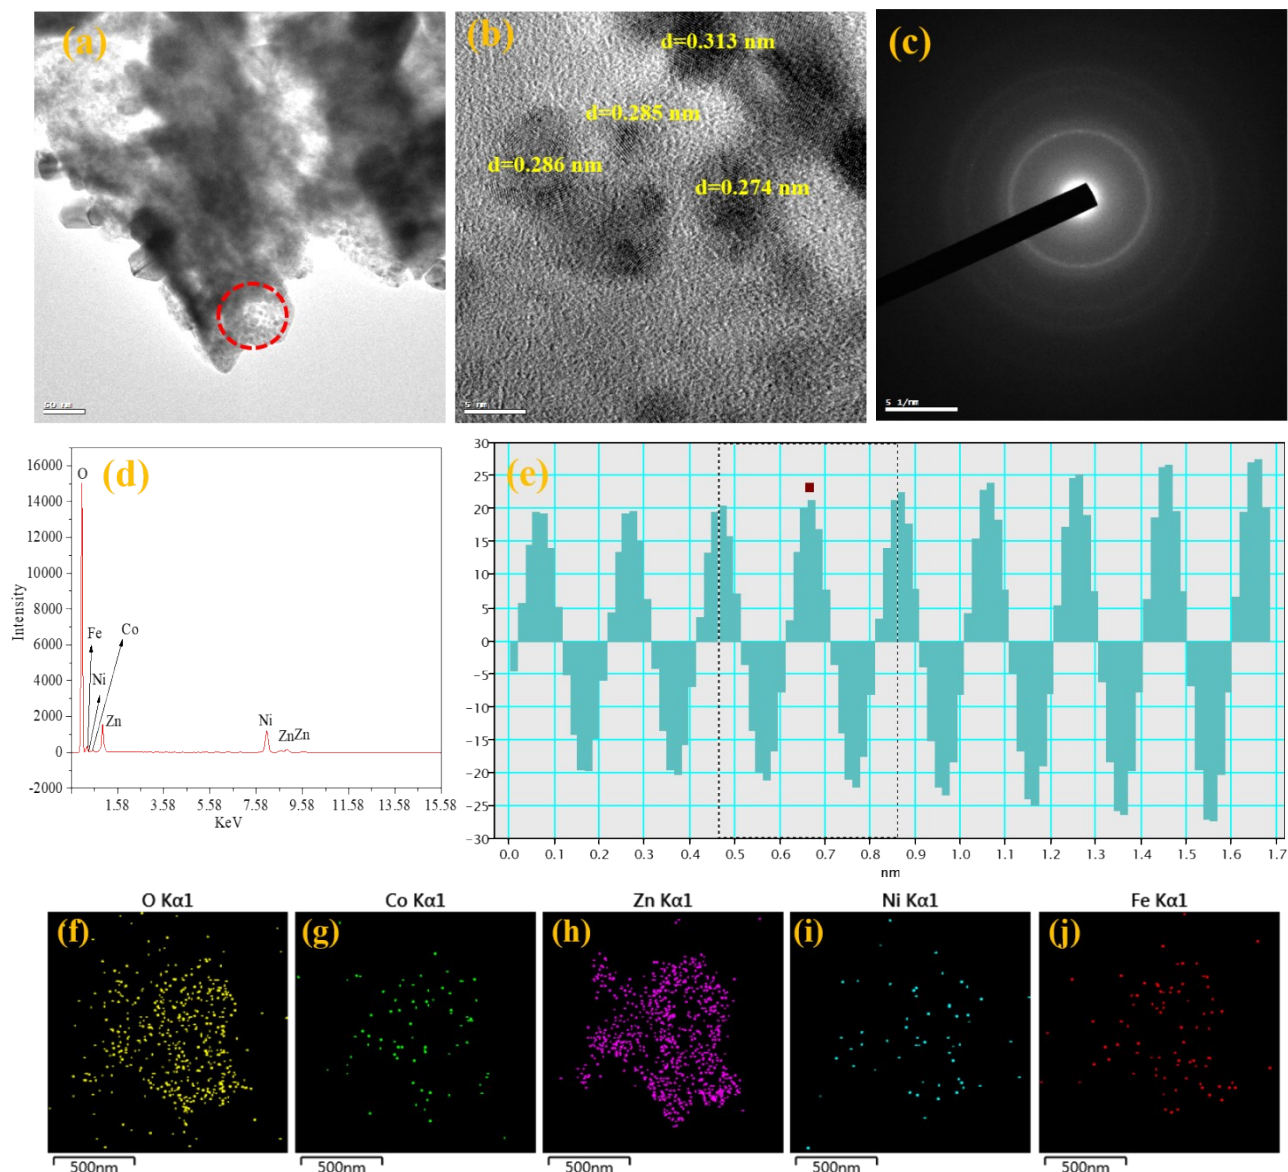

1

2 **Fig. S13** TEM images of used Co/ZnO@NiFe<sub>2</sub>O<sub>4</sub> NPs with the scale bar of (a) 50 nm, (b) 5 nm  
 3 and TEM images of Co/ZnO@NiFe<sub>2</sub>O<sub>4</sub> NPs with a Co load of 2.0 wt%, (c) show the corresponding  
 4 size distribution and SAED patterns (d) TEM-EDX spectrum of Co/ZnO@NiFe<sub>2</sub>O<sub>4</sub> NPs, (e)  
 5 contrast intensity profile indicates the lattice parameter of Co and (f-j) EDS mapping results.

6

7

8

1

2

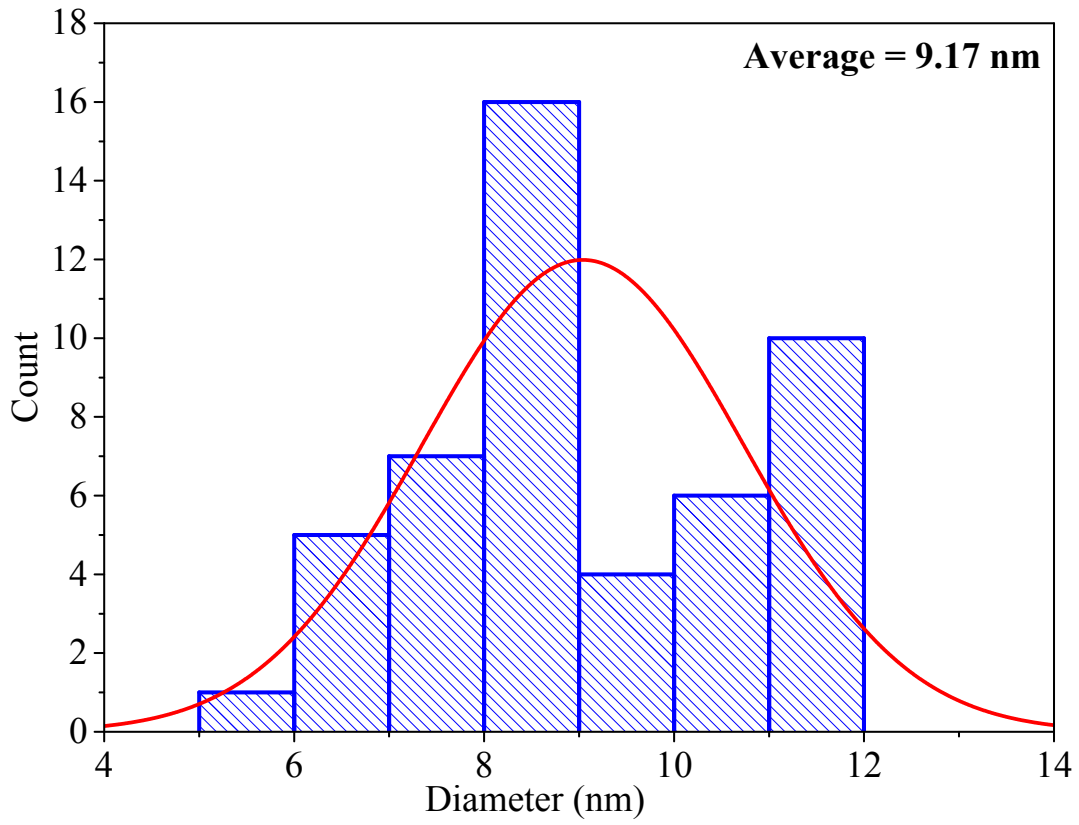

3

4

**Fig. S14** The particle size histograms of used Co/ZnO@NiFe<sub>2</sub>O<sub>4</sub> NPs.

5

6

7

8

9

10

11

12

13

1

2

3

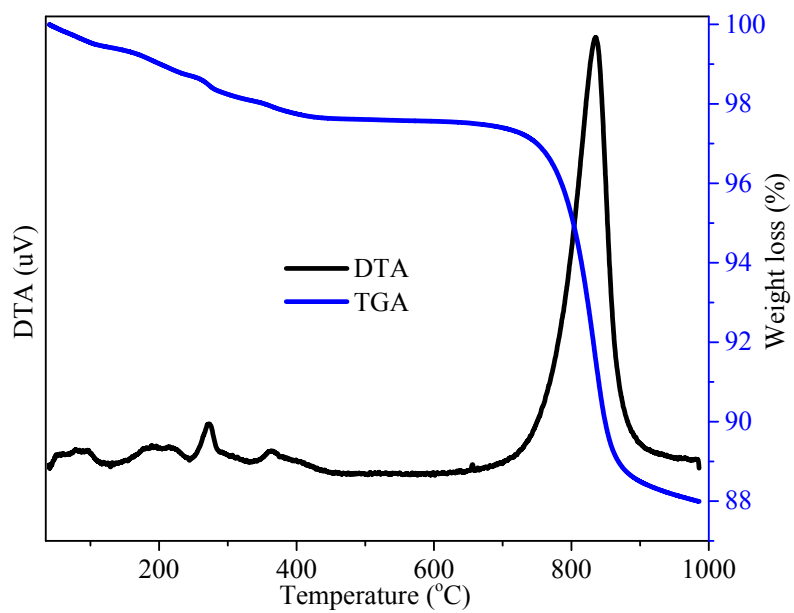

4

5

**Fig. S15** TGA and DTA curves of Co/ZnO@NiFe<sub>2</sub>O<sub>4</sub> nanoparticles catalyst.

6

7

8

9

10

11

12

13

14

15

1 **Table S1.** XPS survey data for the elements on the sample surface before and after the  
 2 decomposition reaction.

3

| Metals | Fresh catalysts |                 |            |           | After used catalysts |                 |                |
|--------|-----------------|-----------------|------------|-----------|----------------------|-----------------|----------------|
|        | $2p_{3/2}$ eV   | $2p_{1/2}$ (eV) | Difference | Satellite | $2p_{3/2}$ (eV)      | $2p_{1/2}$ (eV) | Satellite (eV) |
| Co     | 781.22          | 797.48          | 16.21      | -         | 778.15, 783.37       | 792.56, 796.60  | -              |
| Fe     | 709.79          | 723..91         | 14.13      | -         | 709.63, 715.98       | 723.53          | -              |
| Ni     | 855.07          | 872.76          | 17.69      | 862.25    | 861.88               | 883.34          | 861.88, 883.34 |
| Zn     | 1022.28         | 1045.61         | 23.3       | -         | 1021.71              | 1044.95         | -              |
| O      | 530.73          | 529.25          | 1.48       | -         | 528.32               | 530.17          | -              |

4

5 **Table S2.** Activities in terms of TOF values of different catalysts tested in hydrogen generation  
 6 from  $N_2H_4$  aqueous solution.

| S.No | Catalysts                           | Temp.<br>(K) | TOF ( $h^{-1}$ ) | Ea<br>(kJ/mol) | Reusability |              | Ref. |
|------|-------------------------------------|--------------|------------------|----------------|-------------|--------------|------|
|      |                                     |              |                  |                | Run (No)    | Activity (%) |      |
| 1.   | Pd/Ag/Ni                            | 313          | 30.2             | 75.9           | 5           | 100          | S3   |
| 2.   | $Ni_{30}Fe_{30}Pd_{40}$             | 323          | 21.5             | 40.0           | 5           | 100          | S4   |
| 3.   | $CoRu_{0.11}/\gamma-Al_2O_3$        | 298          | 21.9             | 51.9           | 3           | 100          | S5   |
| 4.   | $Pt_{0.2}Ni_{0.8}/C$                | 323          | 673              | 45.7           | 5           | 100          | S6   |
| 5.   | NiCo/NiO-CoOx                       | 295          | -                | 45.15          | 10          | 99           | S7   |
| 6.   | $Rh_{51}Ni_{19}P_{30}/rGO$          | 298          | 101              | 58.8           | 5           | 100          | S8   |
| 7.   | $Rh_{0.7}Ni_{0.3}/MnOx-MXene$       | 323          | 1101.9           | 36.8           | 6           | 100          | S9   |
| 8.   | $Rh_{34}Ni_{66}@ZIF-8$              | 323          | 140              | 58.1           | 5           | 100          | S10  |
| 9.   | $Ni_{0.9}Pt_{0.1}/MIL-101$          | 303          | 140              | 48.4           | 8           | 100          | S11  |
| 10.  | $Rh_{55}Ni_{45}/Ce(OH)CO_3$ NCs     | 323          | 395              | 38.8           | 4           | 100          | S12  |
| 11.  | $Ni_{0.6}Fe_{0.4}Mo$                | 323          | 28.8             | 50.7           | 3           | 100          | S13  |
| 12.  | $Ni_{0.25}Fe_{0.25}Pd_{0.5}/UiO-66$ | 333          | 120.3            | 43.5           | 5           | 100          | S14  |
| 13.  | $Ni_{0.6}Pt_{0.4}/g-C_3N_4$ NSs     | 323          | 2194             | 35.9           | 5           | 100          | S15  |
| 14.  | $NF_{73}$                           | 333          | 6.9              | 52.07          | 5           | 100          | S16  |

|     |                                                                                       |     |          |       |    |     |              |
|-----|---------------------------------------------------------------------------------------|-----|----------|-------|----|-----|--------------|
| 15. | Ni <sub>0.9</sub> Pt <sub>0.1</sub> /Ce <sub>2</sub> O <sub>3</sub>                   | 298 | 28.1     | 42.3  | 4  | 100 | S17          |
| 16. | Co/ZnO@NiFe <sub>2</sub> O <sub>4</sub>                                               | 298 | 4445.37  | 44.84 | 15 | 100 | Present work |
| 17. | Co/ZnO@NiFe <sub>2</sub> O <sub>4</sub>                                               | 318 | 11159.14 | -     | -  | 100 | Present work |
| 18. | NiIr <sub>0.059</sub> /Al <sub>2</sub> O <sub>3</sub>                                 | 303 | 12.4     | 38.6  | 10 | 99  | S18          |
| 19. | Pt <sub>0.6</sub> Ni <sub>0.4</sub> @ZrO <sub>2</sub> /C/rGO                          | 323 | 1920     | 62.3  | 5  | 100 | S19          |
| 20. | Ni <sub>60</sub> Pt <sub>40</sub> /meso-CeO <sub>2</sub>                              | 323 | 1363     | 58.2  | 20 | 100 | S20          |
| 21. | Ni <sub>4</sub> W/WO <sub>2</sub> /NiWO <sub>4</sub>                                  | 323 | 33       | -     | 10 | 99  | S21          |
| 22. | Ni <sub>10</sub> Mo/Ni-Mo-O                                                           | 323 | 54.5     | 55    | 10 | -   | S22          |
| 23. | Ni-Mo                                                                                 | 303 | -        | 40    | 10 | 99  | S23          |
| 24. | NiPt/NC                                                                               | 323 | 1602     | 48.3  | 10 | 100 | S24          |
| 25. | Ni <sub>60</sub> Pt <sub>40</sub> /MNC-800                                            | 303 | 1667     | 32.2  | 6  | 100 | S25          |
| 26. | Ni <sub>84</sub> Pt <sub>16</sub> /graphene                                           | 298 | 133      | 40    | 3  | 100 | S26          |
| 27. | NiPt/La(OH) <sub>3</sub>                                                              | 323 | 2400     | 53.2  | 5  | 100 | S27          |
|     | CoPt/La(OH) <sub>3</sub>                                                              |     | 2400     | 45.2  | 5  | 100 |              |
| 28. | Cu <sub>0.4</sub> Ni <sub>0.6</sub> Mo                                                | 323 | 108      |       | 10 | 100 | S28          |
| 29. | Ni <sub>0.8</sub> Pt <sub>0.2</sub> /DT-Ti <sub>3</sub> C <sub>2</sub> T <sub>x</sub> | 323 | 1220     | 67.1  | -  | 100 | S29          |

- 1
- 2
- 3
- 4
- 5
- 6
- 7
- 8
- 9
- 10
- 11
- 12
- 13

## 1 References

2

3 1 C. Solis, S. Somacescu, E. Palafox, M. Balaguer and J. M. Serra, *J. Phys. Chem. C*, 2014,  
4 **118**, 24266-24273.

5 2 D. R. Lima, N. Jiang, X. Liu, J. Wang, V. A. Vulcani, A. Martins and A. Pancotti, *ACS Appl.*  
6 *Mater. Interfaces*, 2017, **9**, 39830-39838.

7 3 K. S. Al-Thubaiti and Z. Khan, *Int. J. Hydrogen Energy*, 2020, **45**, 13960-13974.

8 4 D. Bhattacharjee and S. Dasgupta, *J. Mater. Chem. A*, 2015, **3**, 24371-24378.

9 5 N. Firdous, N. K. Janjua and M. H. S. Wattoo, *Int. J. Hydrogen Energy*, 2020, **45**, 21573-  
10 21587.

11 6 J. Wang, A. Khaniya, L. Hu, M. J. Beazley, W. E. Kaden and X. Feng, *J. Mater. Chem.*  
12 *A*, 2018, **6**, 18050-18056.

13 7 D. Wu, M. Wen, X. Lin, Q. Wu, C. Gu and H. Chen, *J. Mater. Chem. A*, 2016, **4**, 6595-  
14 6602.

15 8 X. Du, S. Tan, P. Cai, W. Luo and G. Cheng, *J. Mater. Chem. A*, 2016, **4**, 14572-14576.

16 9 B. Yin, Q. Wang, T. Liu and G. Gao, *New J Chem.*, 2018, **42**, 20001-20006.

17 10 B. Xia, N. Cao, H. Dai, J. Su, X. Wu, W. Luo and G. Cheng, *ChemCatChem.*, 2014, **6**, 2549-  
18 2552.

19 11 Z. Zhang, S. Zhang, Q. Yao, X. Chen and Z. H. Lu, *Inorg. Chem.*, 2017, **56**, 11938-11945.

20 12 J. Chen, Q. Yao, J. Zhu, X. Chen and Z. H. Lu, *Int. J. Hydrogen Energy*, 2016, **41**, 3946-  
21 3954.

22 13 H. L. Wang, J. M. Yan, S. J. Li, X. W. Zhang and Q. Jiang, *J. Mater. Chem. A*, 2014, **3**, 121-  
23 124.



- 1 14 X. Song, P. Yang, J. Wang, X. Zhao, Y. Zhou, Y. Li and L. Yang, *Inorg. Chem. Front.*, 2019,  
2 6, 2727-2735.
- 3 15 C. Wan, L. Sun, L. Xu, D. G. Cheng, F. Chen, X. Zhan and Y. Yang, *J. Mater. Chem.*  
4 *A*, 2019, 7, 8798-8804.
- 5 16 Q. Fu, P. Yang, J. Wang, H. Wang, L. Yang and X. Zhao, *J. Mater. Chem. A*, 2018, 6,  
6 11370-11376.
- 7 17 H. L. Wang, J. M. Yan, Z. L. Wang, O. Song-II and Q. Jiang, *J. Mater. Chem. A*, 2013, 1,  
8 14957-14962.
- 9 18 L. He, Y. Huang, X. Y. Liu, L. Li, A. Wang, X. Wang and T. Zhang, *Appl. Catal.*, 2014,  
10 147, 779-788.
- 11 19 F. Z. Song, X. Yang and Q. Xu, *Small Methods*, 2020, 4, 1900707.
- 12 20 Y. Y. Jiang, H. B. Dai, Y. J. Zhong, D. M. Chen and P. Wang, *Chem. Eur. J.*, 2015, 21,  
13 15439-15445.
- 14 21 Q. Shi, D. X. Zhang, H. Yin, Y. P. Qiu, L. L. Zhou, C. Chen and P. Wang, *ACS Sustain.*  
15 *Chem. Eng.*, 2020, 8, 5595-5603.
- 16 22 Y. P. Qiu, G. X. Cao, H. Wen, Q. Shi, H. Dai and P. Wang, *Int. J. Hydrogen Energy*, 2019,  
17 44, 15110-15117.
- 18 23 Y. Wang, L. Pan, Y. Chen, G. Shen, L. Wang, X. Zhang and J. J. Zou, *Int. J. Hydrogen*  
19 *Energy*, 2020, 45, 15560-15570.
- 20 24 Y. P. Qiu, Q. Shi, L. L. Zhou, M. H. Chen, C. Chen, P. P. Tang and P. Wang, *ACS Appl.*  
21 *Mater. Interfaces*, 2020, 12, 18617-18624.
- 22 25 W. Wang, X. Hong, Q. Yao, Z. H. Lu, *J. Mater. Chem. A*, 2020, 8, 13694-13701.
- 23 26 Y. Du, J. Su, W. Luo and G. Cheng, *ACS Appl. Mater. Interfaces*, 2015, 7, 1031-1034.

- 1 27 K. Wang, Q. Yao, S. Qing and Z.H. Lu, *J. Mater. Chem A*, 2019, **7**, 9903-9911.
- 2 28 Q. Yao, Z. H. Lu, R. Zhang, S. Zhang, X. Chen, and H.L. Jiang, *J. Mater. Chem A*, 2018, **6**,  
3 4386-4393.
- 4 29 F. Guo, H. Zou, Q. Yao, B. Huang and Z.H. Lu, *Renew. Energ.*, 2020, **155**, 1293-1301.
- 5
